# Supplementary material for: Tumour extracellular vesicles induce neutrophil extracellular traps to promote lymph node metastasis
Source: PubMed Central journal article supplement — J Extracell Vesicles. 2023 Aug 10;12(8):12341. doi: 10.1002/jev2.12341 (PMC10415595; doi:10.1002/jev2.12341), 2023-08-10

# Figure S1

a

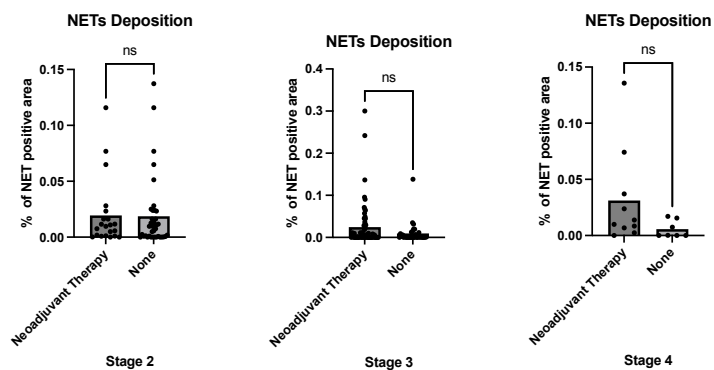

b

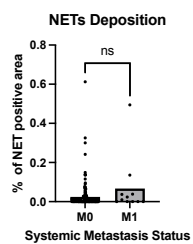

c

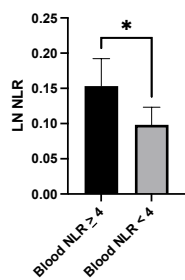

# Figure S2

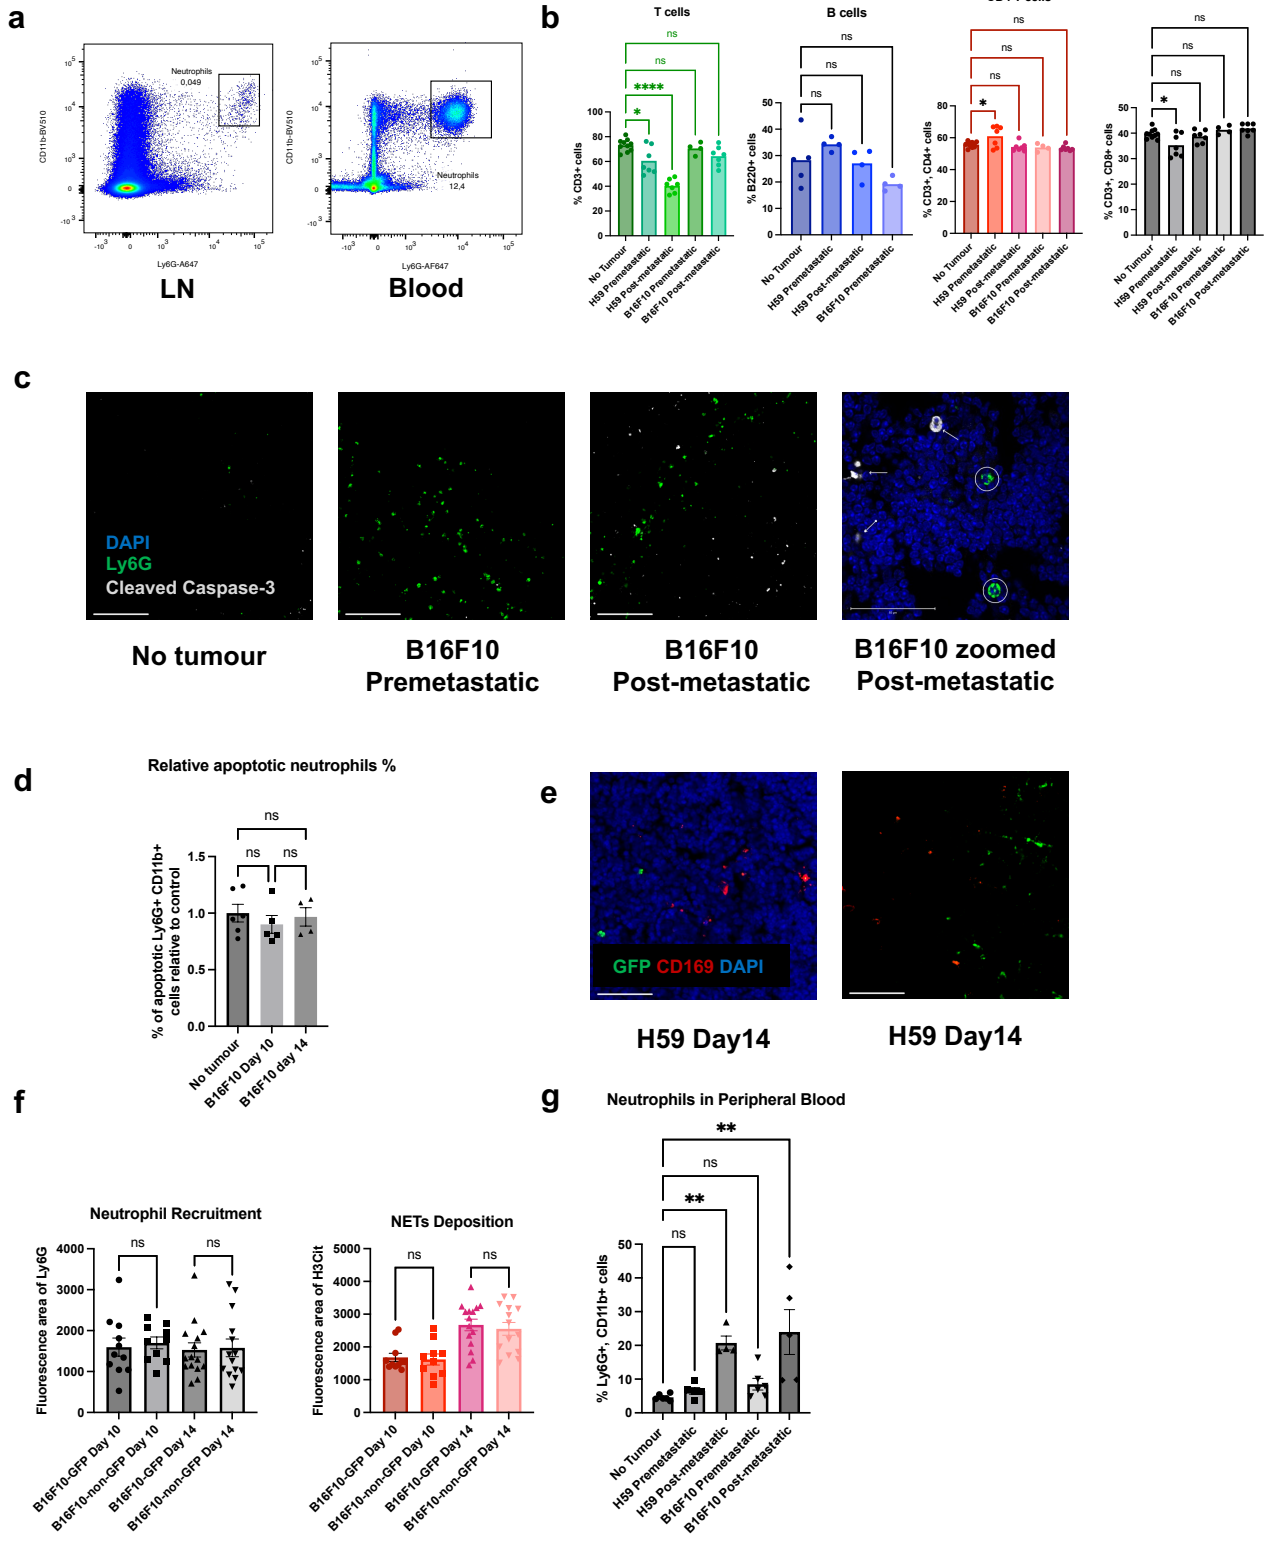

# Figure S3

**a**

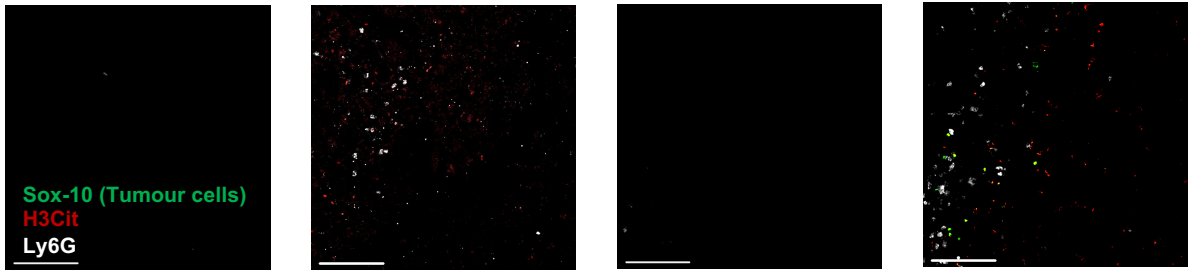

B16F1 Day10

B16F10 Day10

B16F1 Day14

B16F10 Day14

**b**

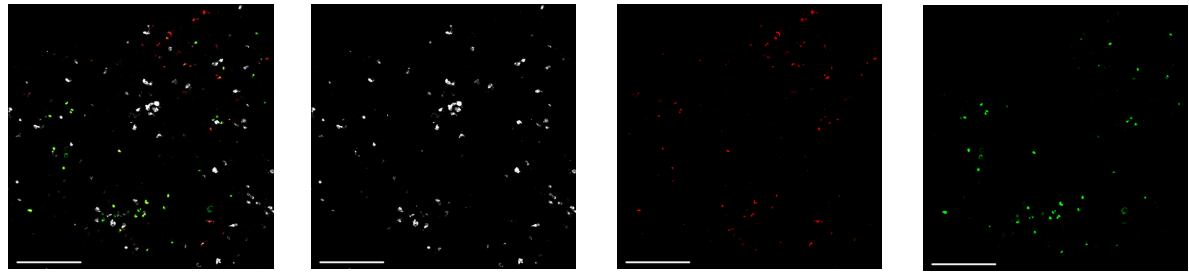

B16F10 Day14  
Merged

Ly6G/Neutrophils

H3Cit/NETs

Sox-10/Tumour Cells

**c**

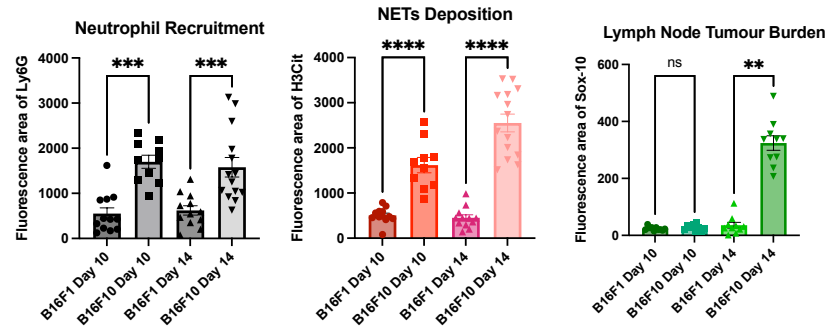

**d**

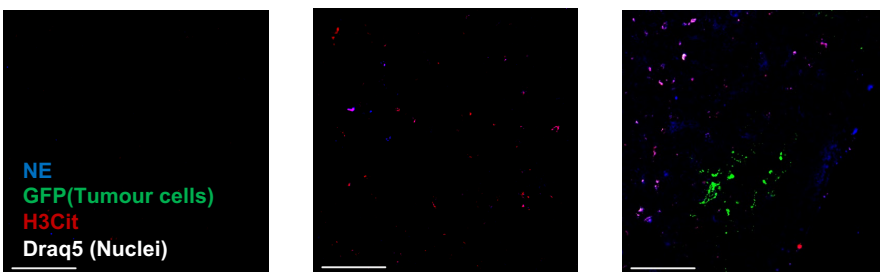

No tumour

B16F10 Day10

B16F10 Day14

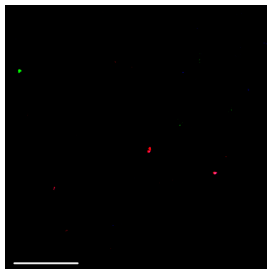

B16F10 Day14  
*pad4*<sup>-/-</sup>

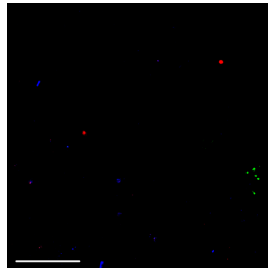

B16F10 Day14  
NEi treated

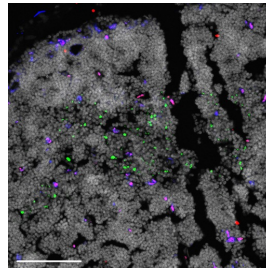

B16F10 Day14

**e**

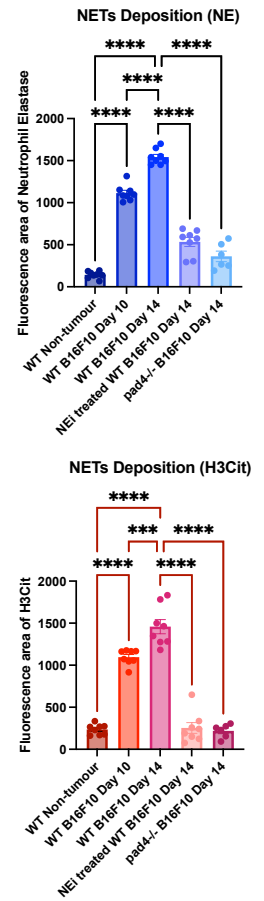



# Figure S5

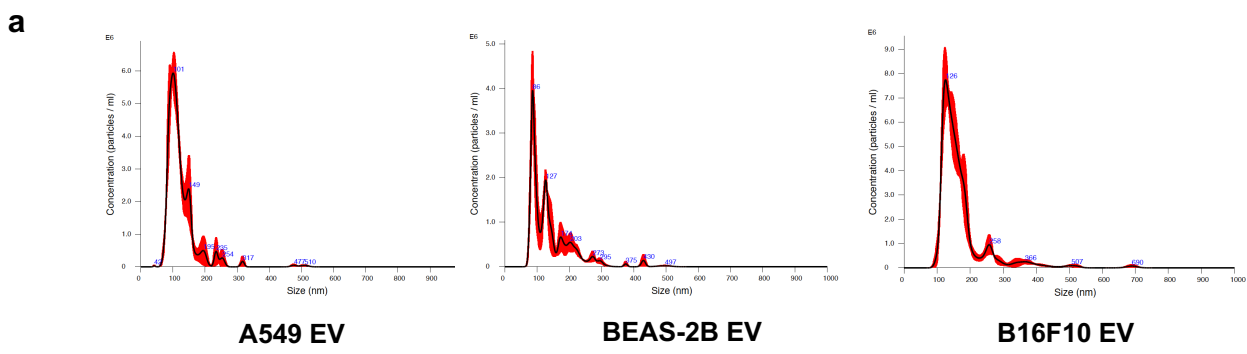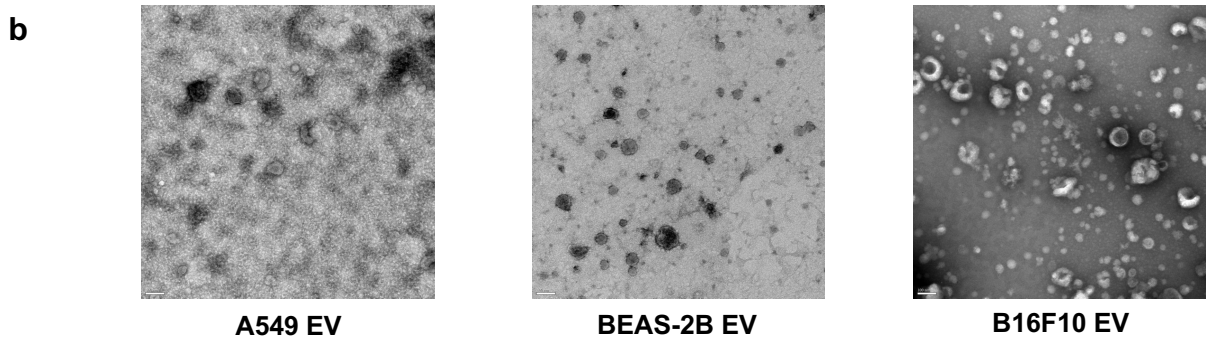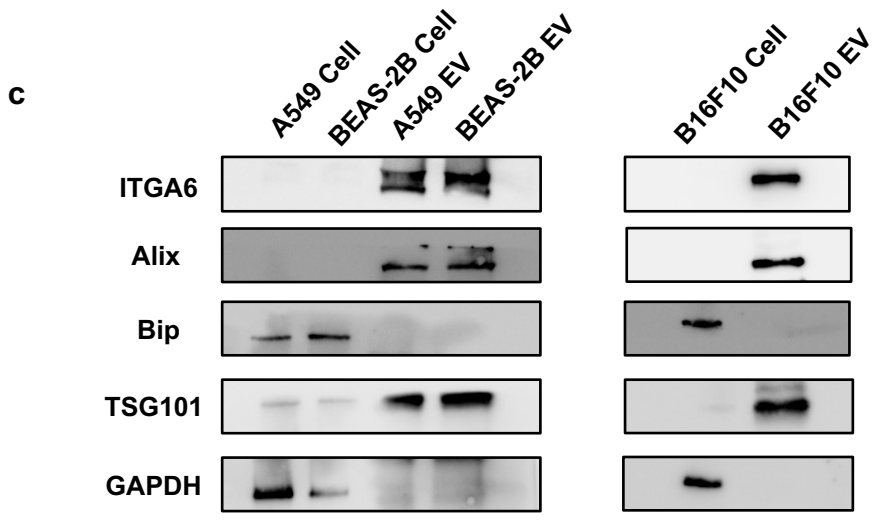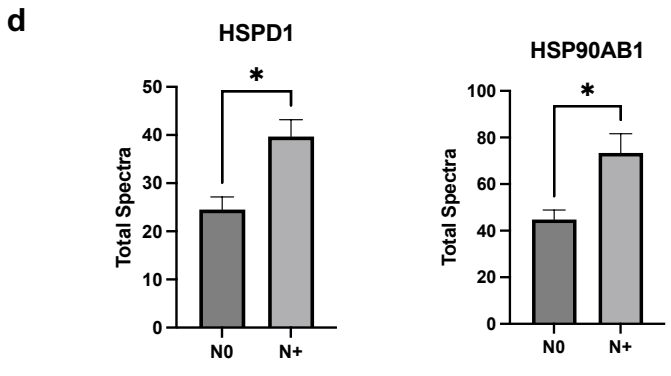

# Figure S6

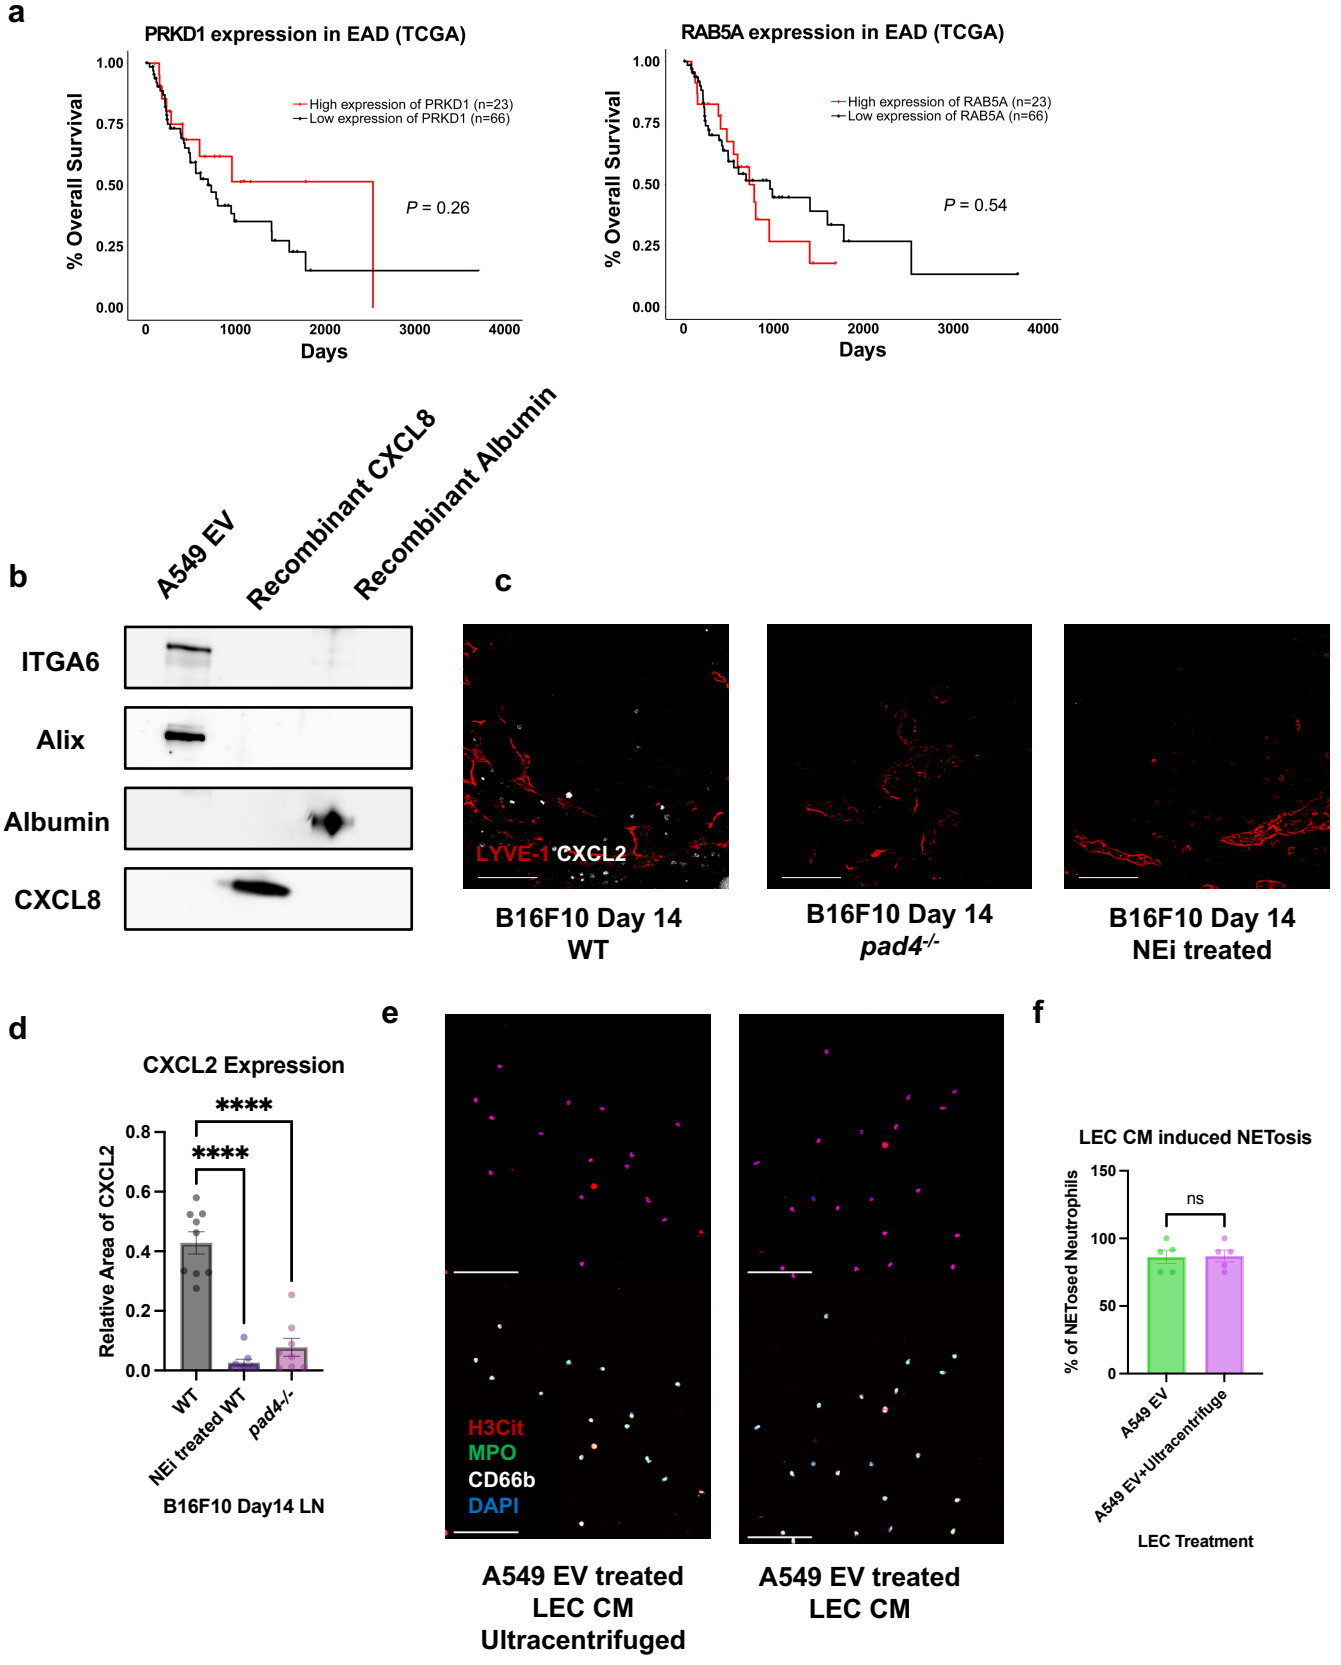

Supplement: JEV2-12-12341-s001.pdf [file JEV2-12-12341-s001.pdf]
